# Supplementary material for: Distinct Neurochemical Signature of Mindfulness and Progressive Muscle Relaxation in limbic regions: a randomized controlled MR spectroscopy study
Source: Research Square preprint supplement (doi:10.21203/rs.3.rs-7722934/v1), 2025-11-13
Supplement: Supplementary file 1 [file 0c4b97b1b6dac7a90911f119.docx]

**SUPPLEMENTARY MATERIALS**

|  | **Mindfulness** | | **Progressive muscle relaxation** | |
| --- | --- | --- | --- | --- |
|  | **Pre-training** | **Post-training** | **Pre-training** | **Post-training** |
| ctx_rh_G_and_S_frontomargin | 0.0014 [0.0011, 0.0015] | 0.0014 [0.0012, 0.0014] | 0.0014 [0.0011, 0.0015] | 0.0014 [0.0012, 0.0014] |
| ctx_rh_G_and_S_occipital_inf | 0.0019 [0.0018, 0.0021] | 0.0019 [0.0017, 0.0021] | 0.0021 [0.0016, 0.0023] | 0.0020 [0.0017, 0.0024] |
| ctx_rh_G_and_S_paracentral | 0.0017 [0.0017, 0.0020] | 0.0018 [0.0017, 0.0020] | 0.0019 [0.0018, 0.0020] | 0.0019 [0.0019, 0.0019] |
| ctx_rh_G_and_S_subcentral | 0.0021 [0.0020, 0.0024] | 0.0022 [0.0020, 0.0024] | 0.0021 [0.0020, 0.0023] | 0.0021 [0.0019, 0.0022] |
| ctx_rh_G_and_S_transv_frontopol | 0.0020 [0.0019, 0.0022] | 0.0020 [0.0018, 0.0022] | 0.0021 [0.0018, 0.0022] | 0.0021 [0.0019, 0.0023] |
| ctx_rh_G_and_S_cingul-Ant | 0.0041 [0.0038, 0.0043] | 0.0040 [0.0037, 0.0043] | 0.0040 [0.0038, 0.0042] | 0.0040 [0.0038, 0.0041] |
| ctx_rh_G_and_S_cingul-Mid-Ant | 0.0018 [0.0016, 0.0020] | 0.0018 [0.0016, 0.0020] | 0.0018 [0.0016, 0.0020] | 0.0018 [0.0016, 0.0019] |
| ctx_rh_G_and_S_cingul-Mid-Post | 0.0019 [0.0018, 0.0020] | 0.0019 [0.0018, 0.0020] | 0.0018 [0.0017, 0.0020] | 0.0018 [0.0017, 0.0021] |
| ctx_rh_G_cingul-Post-dorsal | 0.0009 [0.0009, 0.0011] | 0.0010 [0.0009, 0.0011] | 0.0010 [0.0009, 0.0010] | 0.0010 [0.0009, 0.0010] |
| ctx_rh_G_cingul-Post-ventral | 0.0005 [0.0005, 0.0006] | 0.0006 [0.0005, 0.0006] | 0.0005 [0.0004, 0.0005] | 0.0005 [0.0004, 0.0005] |
| ctx_rh_G_cuneus | 0.0023 [0.0021, 0.0024] | 0.0022 [0.0021, 0.0023] | 0.0023 [0.0021, 0.0024] | 0.0022 [0.0021, 0.0024] |
| ctx_rh_G_front_inf-Opercular | 0.0025 [0.0024, 0.0027] | 0.0025 [0.0024, 0.0026] | 0.0024 [0.0023, 0.0025] | 0.0024 [0.0023, 0.0024] |
| ctx_rh_G_front_inf-Orbital | 0.0008 [0.0006, 0.0009] | 0.0008 [0.0007, 0.0008] | 0.0008 [0.0007, 0.0010] | 0.0007 [0.0007, 0.0009] |
| ctx_rh_G_front_inf-Triangul | 0.0015 [0.0014, 0.0019] | 0.0015 [0.0014, 0.0018] | 0.0015 [0.0015, 0.0017] | 0.0015 [0.0014, 0.0017] |
| ctx_rh_G_front_middle | 0.0061 [0.0057, 0.0069] | 0.0063 [0.0059, 0.0067] | 0.0070 [0.0063, 0.0071] | 0.0066 [0.0063, 0.0071] |
| ctx_rh_G_front_sup | 0.0115 [0.0105, 0.0122] | 0.0113 [0.0107, 0.0121] | 0.0111 [0.0108, 0.0118] | 0.0111 [0.0106, 0.0120] |
| ctx_rh_G_Ins_lg_and_S_cent_ins | 0.0012 [0.0010, 0.0012] | 0.0011 [0.0010, 0.0011] | 0.0011 [0.0011, 0.0012] | 0.0012 [0.0011, 0.0012] |
| ctx_rh_G_insular_short | 0.0015 [0.0015, 0.0016] | 0.0015 [0.0015, 0.0016] | 0.0016 [0.0015, 0.0016] | 0.0015 [0.0014, 0.0016] |
| ctx_rh_G_occipital_middle | 0.0037 [0.0034, 0.0042] | 0.0037 [0.0033, 0.0040] | 0.0037 [0.0036, 0.0043] | 0.0038 [0.0035, 0.0042] |
| ctx_rh_G_occipital_sup | 0.0019 [0.0017, 0.0021] | 0.0019 [0.0017, 0.0021] | 0.0019 [0.0016, 0.0020] | 0.0018 [0.0017, 0.0020] |
| ctx_rh_G_oc-temp_lat-fusifor | 0.0036 [0.0032, 0.0039] | 0.0036 [0.0031, 0.0038] | 0.0038 [0.0031, 0.0041] | 0.0036 [0.0032, 0.0040] |
| ctx_rh_G_oc-temp_med-Lingual | 0.0036 [0.0032, 0.0038] | 0.0036 [0.0034, 0.0039] | 0.0036 [0.0034, 0.0038] | 0.0035 [0.0033, 0.0036] |
| ctx_rh_G_oc-temp_med-Parahip | 0.0027 [0.0023, 0.0028] | 0.0027 [0.0022, 0.0029] | 0.0025 [0.0022, 0.0029] | 0.0025 [0.0022, 0.0028] |
| ctx_rh_G_orbital | 0.0051 [0.0047, 0.0054] | 0.0050 [0.0047, 0.0052] | 0.0051 [0.0048, 0.0053] | 0.0051 [0.0048, 0.0057] |
| ctx_rh_G_pariet_inf-Angular | 0.0049 [0.0044, 0.0052] | 0.0049 [0.0047, 0.0054] | 0.0055 [0.0051, 0.0058] | 0.0053 [0.0051, 0.0056] |
| ctx_rh_G_pariet_inf-Supramar | 0.0043 [0.0041, 0.0046] | 0.0043 [0.0040, 0.0046] | 0.0041 [0.0036, 0.0047] | 0.0041 [0.0036, 0.0048] |
| ctx_rh_G_parietal_sup | 0.0037 [0.0034, 0.0039] | 0.0038 [0.0034, 0.0039] | 0.0035 [0.0034, 0.0040] | 0.0036 [0.0032, 0.0039] |
| ctx_rh_G_postcentral | 0.0025 [0.0024, 0.0027] | 0.0026 [0.0024, 0.0027] | 0.0027 [0.0024, 0.0030] | 0.0026 [0.0024, 0.0028] |
| ctx_rh_G_precentral | 0.0041 [0.0040, 0.0046] | 0.0043 [0.0041, 0.0047] | 0.0045 [0.0041, 0.0047] | 0.0045 [0.0042, 0.0047] |
| ctx_rh_G_precuneus | 0.0041 [0.0039, 0.0043] | 0.0041 [0.0040, 0.0044] | 0.0040 [0.0036, 0.0042] | 0.0040 [0.0037, 0.0042] |
| ctx_rh_G_rectus | 0.0016 [0.0015, 0.0017] | 0.0015 [0.0015, 0.0018] | 0.0015 [0.0015, 0.0017] | 0.0015 [0.0014, 0.0017] |
| ctx_rh_G_subcallosal | 0.0006 [0.0006, 0.0007] | 0.0006 [0.0006, 0.0007] | 0.0007 [0.0006, 0.0007] | 0.0007 [0.0005, 0.0007] |
| ctx_rh_G_temp_sup-G_T_transv | 0.0006 [0.0005, 0.0007] | 0.0006 [0.0005, 0.0007] | 0.0006 [0.0005, 0.0006] | 0.0006 [0.0006, 0.0006] |
| ctx_rh_G_temp_sup-Lateral | 0.0039 [0.0037, 0.0041] | 0.0039 [0.0037, 0.0041] | 0.0039 [0.0035, 0.0040] | 0.0039 [0.0035, 0.0040] |
| ctx_rh_G_temp_sup-Plan_polar | 0.0015 [0.0014, 0.0015] | 0.0015 [0.0013, 0.0017] | 0.0014 [0.0013, 0.0016] | 0.0014 [0.0012, 0.0015] |
| ctx_rh_G_temp_sup-Plan_tempo | 0.0012 [0.0011, 0.0013] | 0.0012 [0.0011, 0.0012] | 0.0012 [0.0010, 0.0013] | 0.0012 [0.0010, 0.0013] |
| ctx_rh_G_temporal_inf | 0.0053 [0.0049, 0.0055] | 0.0053 [0.0046, 0.0054] | 0.0052 [0.0045, 0.0058] | 0.0054 [0.0043, 0.0057] |
| ctx_rh_G_temporal_middle | 0.0065 [0.0060, 0.0069] | 0.0064 [0.0059, 0.0068] | 0.0065 [0.0059, 0.0068] | 0.0063 [0.0058, 0.0065] |
| ctx_rh_Lat_Fis-ant-Horizont | 0.0004 [0.0003, 0.0005] | 0.0004 [0.0003, 0.0005] | 0.0004 [0.0003, 0.0005] | 0.0004 [0.0003, 0.0005] |
| ctx_rh_Lat_Fis-ant-Vertical | 0.0002 [0.0002, 0.0003] | 0.0003 [0.0002, 0.0003] | 0.0003 [0.0002, 0.0003] | 0.0003 [0.0002, 0.0003] |
| ctx_rh_Lat_Fis-post | 0.0013 [0.0012, 0.0014] | 0.0013 [0.0012, 0.0015] | 0.0013 [0.0012, 0.0013] | 0.0013 [0.0013, 0.0013] |
| ctx_rh_Pole_occipital | 0.0032 [0.0030, 0.0035] | 0.0032 [0.0031, 0.0033] | 0.0032 [0.0030, 0.0034] | 0.0031 [0.0030, 0.0032] |
| ctx_rh_Pole_temporal | 0.0044 [0.0041, 0.0048] | 0.0045 [0.0040, 0.0046] | 0.0044 [0.0044, 0.0046] | 0.0044 [0.0043, 0.0046] |
| ctx_rh_S_calcarine | 0.0018 [0.0017, 0.0022] | 0.0018 [0.0016, 0.0021] | 0.0020 [0.0019, 0.0021] | 0.0020 [0.0019, 0.0021] |
| ctx_rh_S_central | 0.0022 [0.0021, 0.0023] | 0.0023 [0.0022, 0.0024] | 0.0023 [0.0021, 0.0025] | 0.0022 [0.0021, 0.0023] |
| ctx_rh_S_cingul-Marginalis | 0.0013 [0.0012, 0.0014] | 0.0013 [0.0012, 0.0014] | 0.0012 [0.0012, 0.0014] | 0.0012 [0.0012, 0.0014] |
| ctx_rh_S_circular_insula_ant | 0.0007 [0.0006, 0.0007] | 0.0006 [0.0006, 0.0007] | 0.0007 [0.0006, 0.0007] | 0.0007 [0.0006, 0.0007] |
| ctx_rh_S_circular_insula_inf | 0.0013 [0.0012, 0.0013] | 0.0012 [0.0012, 0.0013] | 0.0012 [0.0011, 0.0012] | 0.0011 [0.0011, 0.0013] |
| ctx_rh_S_circular_insula_sup | 0.0014 [0.0014, 0.0015] | 0.0014 [0.0013, 0.0015] | 0.0014 [0.0013, 0.0014] | 0.0014 [0.0013, 0.0014] |
| ctx_rh_S_collat_transv_ant | 0.0014 [0.0011, 0.0016] | 0.0014 [0.0011, 0.0015] | 0.0012 [0.0010, 0.0013] | 0.0011 [0.0010, 0.0013] |
| ctx_rh_S_collat_transv_post | 0.0004 [0.0004, 0.0005] | 0.0004 [0.0004, 0.0005] | 0.0005 [0.0004, 0.0005] | 0.0005 [0.0004, 0.0005] |
| ctx_rh_S_front_inf | 0.0018 [0.0016, 0.0019] | 0.0018 [0.0017, 0.0019] | 0.0019 [0.0018, 0.0020] | 0.0019 [0.0018, 0.0020] |
| ctx_rh_S_front_middle | 0.0025 [0.0021, 0.0026] | 0.0025 [0.0021, 0.0027] | 0.0023 [0.0018, 0.0025] | 0.0021 [0.0020, 0.0026] |
| ctx_rh_S_front_sup | 0.0028 [0.0025, 0.0030] | 0.0027 [0.0025, 0.0030] | 0.0026 [0.0024, 0.0029] | 0.0027 [0.0023, 0.0030] |
| ctx_rh_S_interm_prim-Jensen | 0.0004 [0.0004, 0.0005] | 0.0004 [0.0004, 0.0005] | 0.0004 [0.0004, 0.0005] | 0.0005 [0.0004, 0.0006] |
| ctx_rh_S_intrapariet_and_P_trans | 0.0032 [0.0029, 0.0035] | 0.0032 [0.0029, 0.0035] | 0.0033 [0.0030, 0.0036] | 0.0034 [0.0030, 0.0036] |
| ctx_rh_S_oc_middle_and_Lunatus | 0.0008 [0.0007, 0.0009] | 0.0008 [0.0007, 0.0010] | 0.0008 [0.0007, 0.0011] | 0.0008 [0.0008, 0.0010] |
| ctx_rh_S_oc_sup_and_transversal | 0.0014 [0.0012, 0.0015] | 0.0013 [0.0012, 0.0014] | 0.0013 [0.0012, 0.0015] | 0.0013 [0.0012, 0.0015] |
| ctx_rh_S_occipital_ant | 0.0008 [0.0007, 0.0009] | 0.0008 [0.0007, 0.0011] | 0.0008 [0.0007, 0.0009] | 0.0008 [0.0007, 0.0009] |
| ctx_rh_S_oc-temp_lat | 0.0012 [0.0012, 0.0014] | 0.0013 [0.0011, 0.0013] | 0.0012 [0.0012, 0.0013] | 0.0013 [0.0011, 0.0013] |
| ctx_rh_S_oc-temp_med_and_Lingual | 0.0021 [0.0019, 0.0022] | 0.0021 [0.0019, 0.0022] | 0.0022 [0.0020, 0.0022] | 0.0022 [0.0020, 0.0023] |
| ctx_rh_S_orbital_lateral | 0.0004 [0.0003, 0.0004] | 0.0004 [0.0003, 0.0005] | 0.0005 [0.0003, 0.0005] | 0.0004 [0.0003, 0.0005] |
| ctx_rh_S_orbital_med-olfact | 0.0008 [0.0007, 0.0009] | 0.0008 [0.0007, 0.0009] | 0.0007 [0.0007, 0.0008] | 0.0007 [0.0007, 0.0008] |
| ctx_rh_S_orbital-H_Shaped | 0.0016 [0.0015, 0.0018] | 0.0017 [0.0015, 0.0017] | 0.0016 [0.0015, 0.0019] | 0.0016 [0.0015, 0.0018] |
| ctx_rh_S_parieto_occipital | 0.0021 [0.0019, 0.0024] | 0.0021 [0.0020, 0.0025] | 0.0022 [0.0019, 0.0024] | 0.0022 [0.0020, 0.0024] |
| ctx_rh_S_pericallosal | 0.0010 [0.0008, 0.0011] | 0.0010 [0.0008, 0.0011] | 0.0009 [0.0009, 0.0010] | 0.0009 [0.0009, 0.0010] |
| ctx_rh_S_postcentral | 0.0022 [0.0020, 0.0024] | 0.0023 [0.0021, 0.0024] | 0.0021 [0.0020, 0.0026] | 0.0022 [0.0019, 0.0025] |
| ctx_rh_S_precentral-inf-part | 0.0016 [0.0014, 0.0019] | 0.0016 [0.0015, 0.0019] | 0.0018 [0.0017, 0.0019] | 0.0018 [0.0017, 0.0018] |
| ctx_rh_S_precentral-sup-part | 0.0013 [0.0011, 0.0015] | 0.0014 [0.0012, 0.0015] | 0.0012 [0.0011, 0.0013] | 0.0012 [0.0012, 0.0012] |
| ctx_rh_S_suborbital | 0.0004 [0.0003, 0.0004] | 0.0003 [0.0003, 0.0004] | 0.0004 [0.0004, 0.0004] | 0.0004 [0.0004, 0.0004] |
| ctx_rh_S_subparietal | 0.0014 [0.0012, 0.0014] | 0.0014 [0.0012, 0.0015] | 0.0013 [0.0010, 0.0015] | 0.0013 [0.0011, 0.0014] |
| ctx_rh_S_temporal_inf | 0.0014 [0.0013, 0.0016] | 0.0014 [0.0013, 0.0016] | 0.0015 [0.0013, 0.0017] | 0.0014 [0.0013, 0.0016] |
| ctx_rh_S_temporal_sup | 0.0073 [0.0067, 0.0076] | 0.0073 [0.0066, 0.0075] | 0.0071 [0.0069, 0.0077] | 0.0070 [0.0068, 0.0078] |
| ctx_rh_S_temporal_transverse | 0.0003 [0.0003, 0.0003] | 0.0003 [0.0003, 0.0003] | 0.0003 [0.0002, 0.0004] | 0.0003 [0.0002, 0.0004] |

**Supplementary Table 1A :** Normalized regional cortical volumes of the right hemisphere in each group and per visit

|  | **Mindfulness** | | **Progressive muscle relaxation** | |
| --- | --- | --- | --- | --- |
| **median [Q1, Q3]** | **Pre-training** | **Post-training** | **Pre-training** | **Post-training** |
| ctx_lh_G_and_S_frontomargin | 0.0017 [0.0015, 0.0018] | 0.0017 [0.0015, 0.0019] | 0.0017 [0.0017, 0.0018] | 0.0018 [0.0017, 0.0019] |
| ctx_lh_G_and_S_occipital_inf | 0.0022 [0.0020, 0.0026] | 0.0023 [0.0020, 0.0024] | 0.0024 [0.0021, 0.0027] | 0.0022 [0.0021, 0.0026] |
| ctx_lh_G_and_S_paracentral | 0.0021 [0.0020, 0.0022] | 0.0021 [0.0020, 0.0022] | 0.0021 [0.0020, 0.0022] | 0.0021 [0.0020, 0.0022] |
| ctx_lh_G_and_S_subcentral | 0.0024 [0.0022, 0.0025] | 0.0023 [0.0022, 0.0025] | 0.0023 [0.0022, 0.0024] | 0.0022 [0.0021, 0.0024] |
| ctx_lh_G_and_S_transv_frontopol | 0.0014 [0.0014, 0.0015] | 0.0015 [0.0013, 0.0015] | 0.0014 [0.0012, 0.0015] | 0.0014 [0.0013, 0.0016] |
| ctx_lh_G_and_S_cingul-Ant | 0.0032 [0.0029, 0.0034] | 0.0033 [0.0031, 0.0035] | 0.0032 [0.0030, 0.0034] | 0.0031 [0.0030, 0.0035] |
| ctx_lh_G_and_S_cingul-Mid-Ant | 0.0017 [0.0015, 0.0019] | 0.0017 [0.0016, 0.0018] | 0.0016 [0.0015, 0.0017] | 0.0016 [0.0015, 0.0017] |
| ctx_lh_G_and_S_cingul-Mid-Post | 0.0018 [0.0017, 0.0019] | 0.0018 [0.0017, 0.0019] | 0.0017 [0.0016, 0.0019] | 0.0017 [0.0016, 0.0019] |
| ctx_lh_G_cingul-Post-dorsal | 0.0011 [0.0010, 0.0012] | 0.0011 [0.0010, 0.0012] | 0.0011 [0.0010, 0.0012] | 0.0011 [0.0010, 0.0012] |
| ctx_lh_G_cingul-Post-ventral | 0.0005 [0.0004, 0.0005] | 0.0005 [0.0004, 0.0005] | 0.0004 [0.0004, 0.0006] | 0.0004 [0.0004, 0.0005] |
| ctx_lh_G_cuneus | 0.0020 [0.0018, 0.0021] | 0.0020 [0.0018, 0.0022] | 0.0021 [0.0019, 0.0022] | 0.0020 [0.0019, 0.0021] |
| ctx_lh_G_front_inf-Opercular | 0.0025 [0.0023, 0.0026] | 0.0025 [0.0024, 0.0027] | 0.0024 [0.0023, 0.0029] | 0.0024 [0.0023, 0.0027] |
| ctx_lh_G_front_inf-Orbital | 0.0009 [0.0008, 0.0010] | 0.0010 [0.0008, 0.0011] | 0.0008 [0.0008, 0.0010] | 0.0008 [0.0008, 0.0009] |
| ctx_lh_G_front_inf-Triangul | 0.0021 [0.0020, 0.0023] | 0.0021 [0.0020, 0.0023] | 0.0019 [0.0017, 0.0021] | 0.0019 [0.0017, 0.0022] |
| ctx_lh_G_front_middle | 0.0072 [0.0068, 0.0078] | 0.0074 [0.0067, 0.0082] | 0.0077 [0.0071, 0.0081] | 0.0075 [0.0071, 0.0083] |
| ctx_lh_G_front_sup | 0.0123 [0.0120, 0.0129] | 0.0125 [0.0121, 0.0132] | 0.0125 [0.0119, 0.0133] | 0.0126 [0.0117, 0.0130] |
| ctx_lh_G_Ins_lg_and_S_cent_ins | 0.0010 [0.0010, 0.0011] | 0.0011 [0.0010, 0.0011] | 0.0011 [0.0011, 0.0012] | 0.0011 [0.0011, 0.0011] |
| ctx_lh_G_insular_short | 0.0018 [0.0017, 0.0018] | 0.0018 [0.0016, 0.0018] | 0.0017 [0.0016, 0.0019] | 0.0017 [0.0016, 0.0018] |
| ctx_lh_G_occipital_middle | 0.0035 [0.0030, 0.0037] | 0.0033 [0.0030, 0.0036] | 0.0035 [0.0032, 0.0038] | 0.0035 [0.0031, 0.0038] |
| ctx_lh_G_occipital_sup | 0.0016 [0.0015, 0.0018] | 0.0016 [0.0015, 0.0017] | 0.0016 [0.0015, 0.0018] | 0.0015 [0.0014, 0.0017] |
| ctx_lh_G_oc-temp_lat-fusifor | 0.0033 [0.0031, 0.0034] | 0.0032 [0.0030, 0.0034] | 0.0034 [0.0031, 0.0036] | 0.0032 [0.0030, 0.0035] |
| ctx_lh_G_oc-temp_med-Lingual | 0.0033 [0.0032, 0.0041] | 0.0033 [0.0031, 0.0040] | 0.0035 [0.0034, 0.0038] | 0.0036 [0.0033, 0.0037] |
| ctx_lh_G_oc-temp_med-Parahip | 0.0027 [0.0023, 0.0033] | 0.0026 [0.0024, 0.0031] | 0.0022 [0.0020, 0.0027] | 0.0023 [0.0019, 0.0026] |
| ctx_lh_G_orbital | 0.0045 [0.0042, 0.0049] | 0.0045 [0.0043, 0.0048] | 0.0046 [0.0043, 0.0049] | 0.0045 [0.0043, 0.0048] |
| ctx_lh_G_pariet_inf-Angular | 0.0046 [0.0042, 0.0048] | 0.0047 [0.0041, 0.0048] | 0.0047 [0.0041, 0.0050] | 0.0047 [0.0043, 0.0049] |
| ctx_lh_G_pariet_inf-Supramar | 0.0048 [0.0044, 0.0055] | 0.0048 [0.0045, 0.0053] | 0.0049 [0.0045, 0.0054] | 0.0050 [0.0045, 0.0052] |
| ctx_lh_G_parietal_sup | 0.0041 [0.0040, 0.0046] | 0.0042 [0.0039, 0.0046] | 0.0042 [0.0040, 0.0048] | 0.0042 [0.0040, 0.0047] |
| ctx_lh_G_postcentral | 0.0028 [0.0027, 0.0030] | 0.0028 [0.0027, 0.0031] | 0.0032 [0.0027, 0.0035] | 0.0031 [0.0028, 0.0033] |
| ctx_lh_G_precentral | 0.0044 [0.0042, 0.0045] | 0.0045 [0.0043, 0.0047] | 0.0044 [0.0044, 0.0048] | 0.0045 [0.0044, 0.0048] |
| ctx_lh_G_precuneus | 0.0043 [0.0040, 0.0046] | 0.0043 [0.0041, 0.0046] | 0.0040 [0.0038, 0.0045] | 0.0041 [0.0037, 0.0046] |
| ctx_lh_G_rectus | 0.0017 [0.0016, 0.0019] | 0.0017 [0.0015, 0.0018] | 0.0017 [0.0016, 0.0019] | 0.0018 [0.0017, 0.0018] |
| ctx_lh_G_subcallosal | 0.0008 [0.0007, 0.0009] | 0.0008 [0.0007, 0.0009] | 0.0008 [0.0006, 0.0008] | 0.0007 [0.0005, 0.0007] |
| ctx_lh_G_temp_sup-G_T_transv | 0.0007 [0.0006, 0.0008] | 0.0007 [0.0007, 0.0008] | 0.0008 [0.0007, 0.0009] | 0.0008 [0.0007, 0.0009] |
| ctx_lh_G_temp_sup-Lateral | 0.0046 [0.0042, 0.0048] | 0.0045 [0.0044, 0.0048] | 0.0046 [0.0042, 0.0049] | 0.0044 [0.0043, 0.0047] |
| ctx_lh_G_temp_sup-Plan_polar | 0.0015 [0.0014, 0.0016] | 0.0015 [0.0014, 0.0016] | 0.0015 [0.0014, 0.0016] | 0.0015 [0.0014, 0.0016] |
| ctx_lh_G_temp_sup-Plan_tempo | 0.0017 [0.0013, 0.0019] | 0.0017 [0.0013, 0.0019] | 0.0014 [0.0013, 0.0017] | 0.0014 [0.0013, 0.0016] |
| ctx_lh_G_temporal_inf | 0.0053 [0.0047, 0.0057] | 0.0051 [0.0046, 0.0057] | 0.0053 [0.0049, 0.0060] | 0.0054 [0.0049, 0.0059] |
| ctx_lh_G_temporal_middle | 0.0056 [0.0054, 0.0061] | 0.0056 [0.0053, 0.0061] | 0.0060 [0.0058, 0.0062] | 0.0059 [0.0055, 0.0062] |
| ctx_lh_Lat_Fis-ant-Horizont | 0.0003 [0.0003, 0.0004] | 0.0003 [0.0003, 0.0004] | 0.0003 [0.0003, 0.0004] | 0.0003 [0.0003, 0.0004] |
| ctx_lh_Lat_Fis-ant-Vertical | 0.0003 [0.0003, 0.0004] | 0.0003 [0.0003, 0.0004] | 0.0004 [0.0003, 0.0005] | 0.0004 [0.0003, 0.0004] |
| ctx_lh_Lat_Fis-post | 0.0010 [0.0010, 0.0012] | 0.0010 [0.0010, 0.0012] | 0.0010 [0.0009, 0.0011] | 0.0010 [0.0009, 0.0011] |
| ctx_lh_Pole_occipital | 0.0019 [0.0018, 0.0020] | 0.0018 [0.0018, 0.0020] | 0.0018 [0.0017, 0.0020] | 0.0018 [0.0018, 0.0019] |
| ctx_lh_Pole_temporal | 0.0041 [0.0039, 0.0042] | 0.0040 [0.0037, 0.0041] | 0.0040 [0.0039, 0.0043] | 0.0040 [0.0037, 0.0041] |
| ctx_lh_S_calcarine | 0.0017 [0.0016, 0.0022] | 0.0017 [0.0016, 0.0021] | 0.0021 [0.0018, 0.0022] | 0.0020 [0.0018, 0.0022] |
| ctx_lh_S_central | 0.0024 [0.0023, 0.0025] | 0.0024 [0.0023, 0.0026] | 0.0025 [0.0024, 0.0027] | 0.0025 [0.0024, 0.0027] |
| ctx_lh_S_cingul-Marginalis | 0.0011 [0.0010, 0.0012] | 0.0011 [0.0009, 0.0013] | 0.0010 [0.0009, 0.0011] | 0.0010 [0.0009, 0.0011] |
| ctx_lh_S_circular_insula_ant | 0.0006 [0.0005, 0.0006] | 0.0006 [0.0006, 0.0006] | 0.0005 [0.0005, 0.0006] | 0.0006 [0.0006, 0.0006] |
| ctx_lh_S_circular_insula_inf | 0.0015 [0.0014, 0.0016] | 0.0015 [0.0014, 0.0016] | 0.0015 [0.0014, 0.0016] | 0.0015 [0.0014, 0.0016] |
| ctx_lh_S_circular_insula_sup | 0.0017 [0.0016, 0.0018] | 0.0017 [0.0015, 0.0018] | 0.0016 [0.0016, 0.0017] | 0.0016 [0.0016, 0.0017] |
| ctx_lh_S_collat_transv_ant | 0.0013 [0.0012, 0.0015] | 0.0013 [0.0011, 0.0015] | 0.0011 [0.0010, 0.0013] | 0.0010 [0.0009, 0.0012] |
| ctx_lh_S_collat_transv_post | 0.0004 [0.0004, 0.0005] | 0.0005 [0.0004, 0.0005] | 0.0005 [0.0004, 0.0006] | 0.0005 [0.0004, 0.0005] |
| ctx_lh_S_front_inf | 0.0023 [0.0021, 0.0026] | 0.0023 [0.0022, 0.0025] | 0.0025 [0.0021, 0.0027] | 0.0024 [0.0021, 0.0026] |
| ctx_lh_S_front_middle | 0.0014 [0.0013, 0.0016] | 0.0014 [0.0012, 0.0016] | 0.0014 [0.0013, 0.0016] | 0.0015 [0.0012, 0.0016] |
| ctx_lh_S_front_sup | 0.0030 [0.0028, 0.0034] | 0.0030 [0.0029, 0.0035] | 0.0033 [0.0030, 0.0035] | 0.0032 [0.0029, 0.0035] |
| ctx_lh_S_interm_prim-Jensen | 0.0004 [0.0002, 0.0005] | 0.0004 [0.0002, 0.0005] | 0.0003 [0.0003, 0.0005] | 0.0004 [0.0003, 0.0005] |
| ctx_lh_S_intrapariet_and_P_trans | 0.0028 [0.0024, 0.0030] | 0.0028 [0.0025, 0.0030] | 0.0028 [0.0027, 0.0030] | 0.0028 [0.0027, 0.0029] |
| ctx_lh_S_oc_middle_and_Lunatus | 0.0008 [0.0008, 0.0010] | 0.0009 [0.0007, 0.0011] | 0.0009 [0.0007, 0.0011] | 0.0009 [0.0007, 0.0011] |
| ctx_lh_S_oc_sup_and_transversal | 0.0012 [0.0010, 0.0013] | 0.0011 [0.0010, 0.0013] | 0.0011 [0.0010, 0.0012] | 0.0011 [0.0010, 0.0013] |
| ctx_lh_S_occipital_ant | 0.0007 [0.0006, 0.0009] | 0.0007 [0.0006, 0.0008] | 0.0008 [0.0007, 0.0009] | 0.0009 [0.0007, 0.0009] |
| ctx_lh_S_oc-temp_lat | 0.0010 [0.0009, 0.0012] | 0.0010 [0.0010, 0.0013] | 0.0010 [0.0009, 0.0012] | 0.0011 [0.0010, 0.0012] |
| ctx_lh_S_oc-temp_med_and_Lingual | 0.0023 [0.0021, 0.0024] | 0.0023 [0.0021, 0.0024] | 0.0022 [0.0021, 0.0023] | 0.0022 [0.0020, 0.0024] |
| ctx_lh_S_orbital_lateral | 0.0004 [0.0003, 0.0004] | 0.0004 [0.0003, 0.0004] | 0.0003 [0.0003, 0.0004] | 0.0003 [0.0003, 0.0003] |
| ctx_lh_S_orbital_med-olfact | 0.0007 [0.0006, 0.0007] | 0.0007 [0.0006, 0.0007] | 0.0007 [0.0007, 0.0007] | 0.0007 [0.0006, 0.0007] |
| ctx_lh_S_orbital-H_Shaped | 0.0020 [0.0018, 0.0020] | 0.0019 [0.0018, 0.0020] | 0.0019 [0.0017, 0.0021] | 0.0019 [0.0017, 0.0021] |
| ctx_lh_S_parieto_occipital | 0.0021 [0.0020, 0.0022] | 0.0021 [0.0020, 0.0023] | 0.0020 [0.0020, 0.0023] | 0.0021 [0.0020, 0.0023] |
| ctx_lh_S_pericallosal | 0.0009 [0.0008, 0.0010] | 0.0009 [0.0008, 0.0010] | 0.0009 [0.0007, 0.0010] | 0.0008 [0.0007, 0.0010] |
| ctx_lh_S_postcentral | 0.0028 [0.0025, 0.0029] | 0.0028 [0.0026, 0.0030] | 0.0027 [0.0025, 0.0030] | 0.0027 [0.0025, 0.0029] |
| ctx_lh_S_precentral-inf-part | 0.0016 [0.0015, 0.0017] | 0.0016 [0.0015, 0.0018] | 0.0018 [0.0016, 0.0021] | 0.0018 [0.0016, 0.0020] |
| ctx_lh_S_precentral-sup-part | 0.0013 [0.0012, 0.0015] | 0.0013 [0.0012, 0.0015] | 0.0013 [0.0012, 0.0014] | 0.0013 [0.0012, 0.0014] |
| ctx_lh_S_suborbital | 0.0008 [0.0007, 0.0009] | 0.0008 [0.0007, 0.0008] | 0.0007 [0.0007, 0.0008] | 0.0007 [0.0007, 0.0008] |
| ctx_lh_S_subparietal | 0.0010 [0.0010, 0.0011] | 0.0010 [0.0010, 0.0012] | 0.0011 [0.0009, 0.0011] | 0.0010 [0.0009, 0.0011] |
| ctx_lh_S_temporal_inf | 0.0018 [0.0017, 0.0019] | 0.0017 [0.0015, 0.0018] | 0.0017 [0.0016, 0.0019] | 0.0018 [0.0016, 0.0019] |
| ctx_lh_S_temporal_sup | 0.0069 [0.0066, 0.0074] | 0.0069 [0.0066, 0.0071] | 0.0072 [0.0067, 0.0074] | 0.0070 [0.0065, 0.0074] |
| ctx_lh_S_temporal_transverse | 0.0004 [0.0003, 0.0004] | 0.0004 [0.0003, 0.0004] | 0.0004 [0.0004, 0.0004] | 0.0004 [0.0003, 0.0004] |

**Supplementary Table 1B :** Normalized regional cortical volumes of the left hemisphere in each group and per visit

|  | **Mindfulness** | | **Progressive muscle relaxation** | |
| --- | --- | --- | --- | --- |
| **median [Q1, Q3]** | **Pre-training** | **Post-training** | **Pre-training** | **Post-training** |
| Left-Cerebellum-Cortex | 0.040 [0.034, 0.042] | 0.039 [0.035, 0.042] | 0.0399 [0.0380, 0.0409] | 0.0394 [0.0372, 0.0404] |
| Left-Thalamus | 0.0053 [0.0050, 0.0055] | 0.0052 [0.0050, 0.0054] | 0.0052 [0.0051, 0.0054] | 0.0052 [0.0050, 0.0054] |
| Left-Caudate | 0.0026 [0.0025, 0.0028] | 0.0026 [0.0025, 0.0027] | 0.0028 [0.0024, 0.0029] | 0.0026 [0.0024, 0.0028] |
| Left-Putamen | 0.0035 [0.0033, 0.0038] | 0.0036 [0.0032, 0.0038] | 0.0034 [0.0033, 0.0037] | 0.0034 [0.0033, 0.0036] |
| Left-Pallidum | 0.0014 [0.0014, 0.0015] | 0.0014 [0.0013, 0.0015] | 0.0013 [0.0013, 0.0014] | 0.0014 [0.0013, 0.0015] |
| Left-Hippocampus | 0.0028 [0.0027, 0.0030] | 0.0028 [0.0027, 0.0030] | 0.0029 [0.0027, 0.0030] | 0.0029 [0.0027, 0.0030] |
| Left-Amygdala | 0.0011 [0.0011, 0.0013] | 0.0012 [0.0011, 0.0012] | 0.0012 [0.0012, 0.0013] | 0.0012 [0.0012, 0.0013] |
| Left-Accumbens-area | 0.0004 [0.0004, 0.0004] | 0.0004 [0.0004, 0.0004] | 0.0004 [0.0003, 0.0004] | 0.0004 [0.0003, 0.0004] |
| Right-Cerebellum-Cortex | 0.039 [0.035, 0.042] | 0.038 [0.035, 0.042] | 0.0399 [0.0382, 0.0413] | 0.0397 [0.0382, 0.0407] |
| Right-Thalamus | 0.0050 [0.0049, 0.0052] | 0.0050 [0.0050, 0.0053] | 0.0052 [0.0051, 0.0053] | 0.0052 [0.0049, 0.0053] |
| Right-Caudate | 0.0027 [0.0025, 0.0028] | 0.0026 [0.0025, 0.0028] | 0.0028 [0.0025, 0.0029] | 0.0027 [0.0024, 0.0029] |
| Right-Putamen | 0.0035 [0.0033, 0.0038] | 0.0036 [0.0033, 0.0039] | 0.0035 [0.0033, 0.0038] | 0.0035 [0.0033, 0.0037] |
| Right-Pallidum | 0.0013 [0.0012, 0.0014] | 0.0013 [0.0012, 0.0014] | 0.0013 [0.0011, 0.0013] | 0.0013 [0.0011, 0.0013] |
| Right-Hippocampus | 0.0028 [0.0027, 0.0032] | 0.0028 [0.0027, 0.0031] | 0.0029 [0.0027, 0.0030] | 0.0029 [0.0027, 0.0030] |
| Right-Amygdala | 0.0012 [0.0011, 0.0012] | 0.0012 [0.0011, 0.0012] | 0.0012 [0.0011, 0.0012] | 0.0012 [0.0011, 0.0013] |
| Right-Accumbens-area | 0.0004 [0.0004, 0.0005] | 0.0005 [0.0004, 0.0005] | 0.0004 [0.0004, 0.0005] | 0.0004 [0.0004, 0.0005] |
| CC_Posterior | 0.0006 [0.0006, 0.0007] | 0.0006 [0.0006, 0.0007] | 0.0007 [0.0006, 0.0007] | 0.0007 [0.0006, 0.0007] |
| CC_Mid_Posterior | 0.0004 [0.0003, 0.0004] | 0.0004 [0.0003, 0.0004] | 0.0004 [0.0003, 0.0004] | 0.0004 [0.0003, 0.0004] |
| CC_Central | 0.0004 [0.0004, 0.0005] | 0.0004 [0.0004, 0.0005] | 0.0004 [0.0003, 0.0005] | 0.0004 [0.0003, 0.0005] |
| CC_Mid_Anterior | 0.0004 [0.0004, 0.0005] | 0.0004 [0.0003, 0.0005] | 0.0004 [0.0003, 0.0004] | 0.0004 [0.0003, 0.0004] |
| CC_Anterior | 0.0006 [0.0006, 0.0006] | 0.0006 [0.0006, 0.0006] | 0.0006 [0.0006, 0.0007] | 0.0006 [0.0006, 0.0007] |

**Supplementary Table 1C :** Normalized regional subcortical volumes in each group and per visit.
